# Supplementary material for: A dodecameric self-assembled calix[4]arene aggregate with two types of cavities
Source: Royal Society of Chemistry journal article supplement (doi:10.1039/c1cc12245b), 2011-01-01
Supplement: c1cc12245b.pdf [file c1cc12245b.pdf]

## Electronic Supplementary Information

5

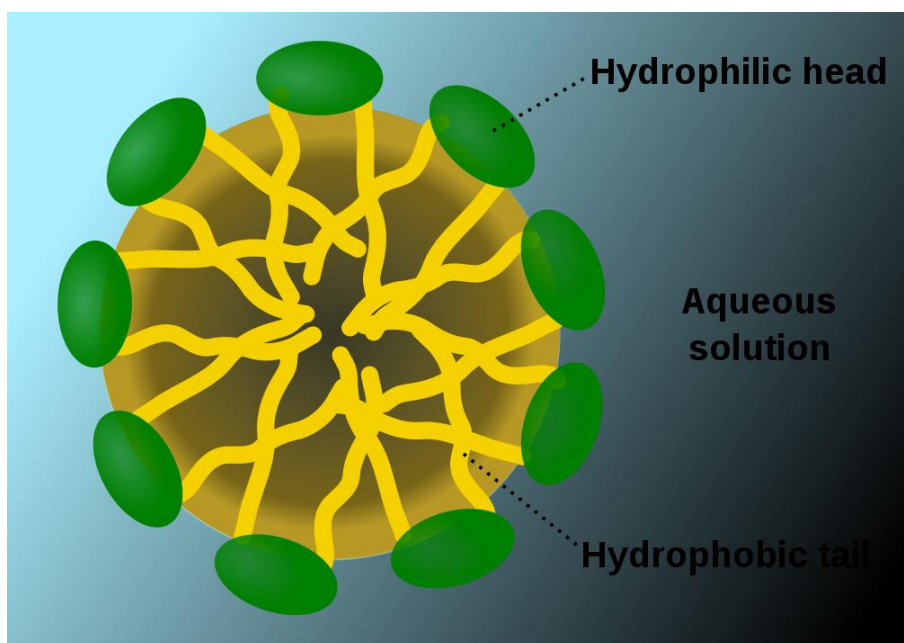

Sketch 1 A figurative representation of a micelle taken from Wikipedia

10

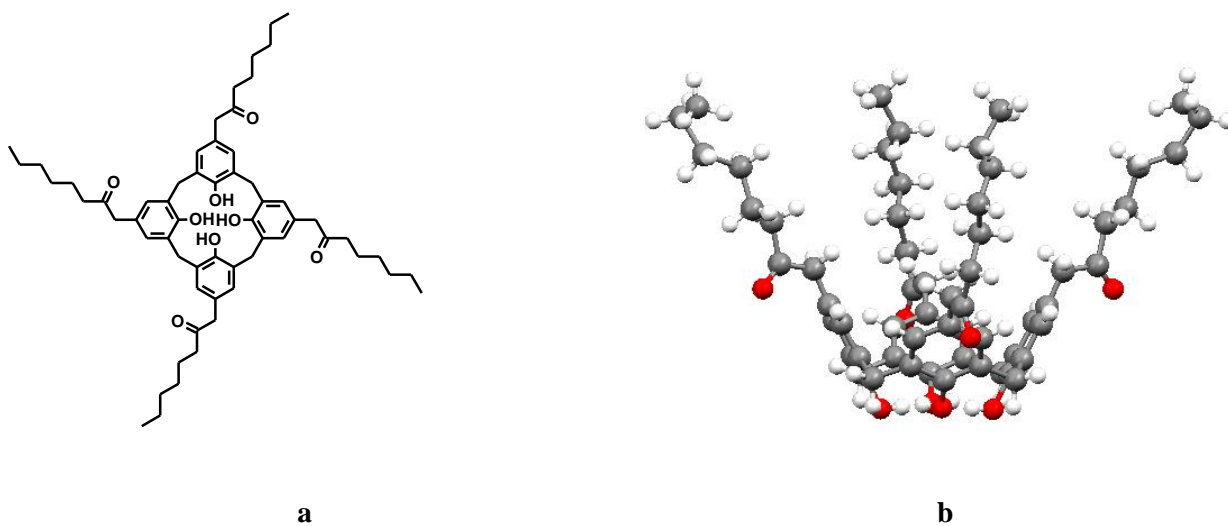

Figure 1.  $\beta$ -Carbonyl-*para*-octyl-calix[4]arene: (a) molecular formula, (b) the molecular structure as found in cubic structure.

15

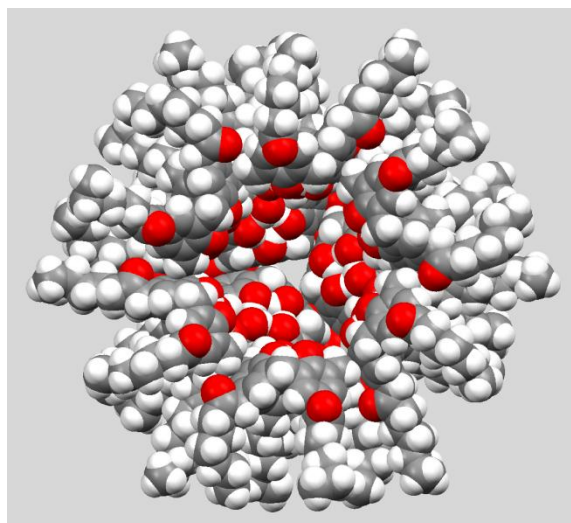

Figure 2. The structure of  $\beta$ -carbonyl-*para*-octyl-calix[4]arene inverted micelle: the space filling presentation – 3 top molecules have been removed to allow the central hydrophilic void to be seen.

5

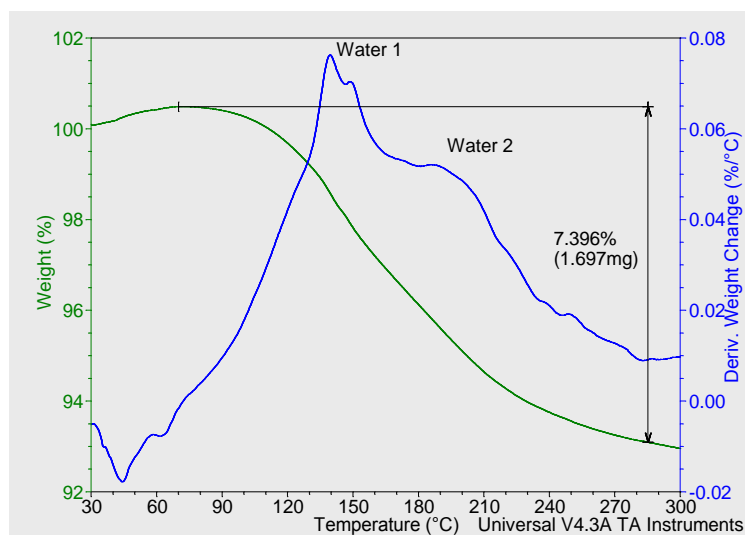

Figure 3. TGA curves (Du Pont Thermal Analyst System 2100, TGA 951; thermal program: heat from room temperature at 10 °C/min; sample mass 22.9 mg, the sample was dried on air for 24 hours; purge gas: argon; sample pan: platinum).

10
